# Supplementary material for: Hsa_circ_0001361 facilitates the progress of lung adenocarcinoma cells via targeting miR-525-5p/VMA21 axis
Source: PubMed Central journal article supplement (PMC8434718; doi:10.1186/s12967-021-03045-4), 2021-09-10
Supplement: 12967_2021_3045_MOESM1_ESM.pdf [file 12967_2021_3045_MOESM1_ESM.pdf]

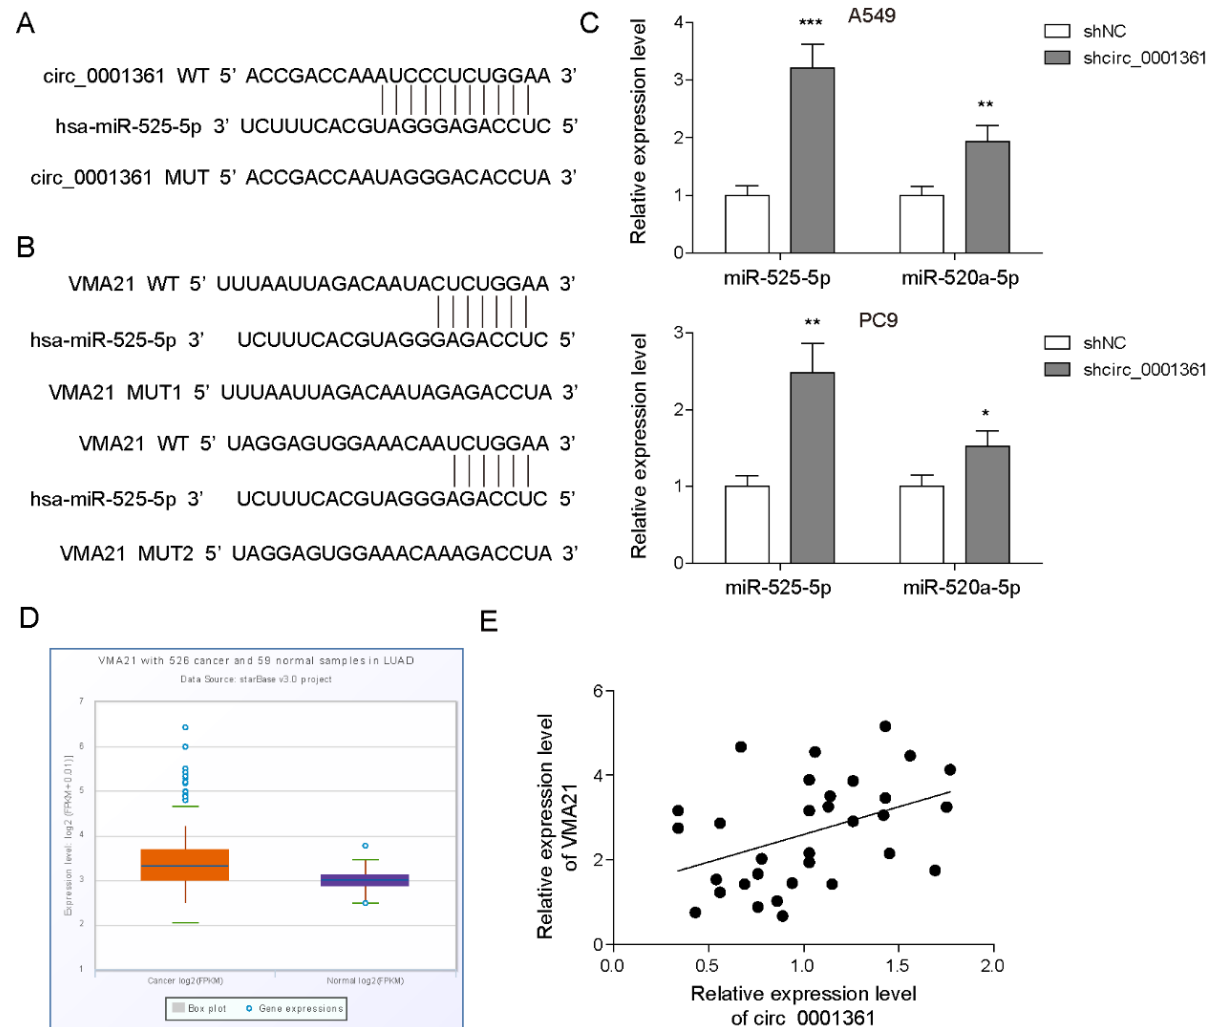

Supplementary Figure legend. (A) The putative binding sites between miR-525-5p and circ\_0001361. (B) The predicted miR-525-5p binding sites in VMA21 3'UTR. (C) RT-qPCR was used to detect the levels of miR-525-5p and miR-520a-5p in A549 and PC9 cells. (D) The expression of VMA21 in LUAD samples and normal samples was evaluated by StarBase database. (E) The correlation between circ\_0001361 and VMA21 transcript in 32 LUAD samples was determined by Pearson correlation analysis.
